# Supplementary material for: The Prognostic and Predictive Value of Dihydropyrimidine Dehydrogenase-Related Indicators in Clinical Outcomes of Chemotherapy in Colorectal Cancer Patients: a Systematic Review and Meta-Analysis
Source: Springer Nature journal article supplement (doi:10.1007/s12253-018-00563-3), 2018-12-05
Supplement: MOESM1 [file 16316832]

Supplementary table 1. The search strategy in PubMed database.

| Search | Query | Items found | Time |
| --- | --- | --- | --- |
| #4 | Search ((#1) AND #2) AND #3 | 541 | 21:05:27 |
| #3 | Search (dihydropyrimidine dehydrogenase OR DPYD OR DPD) | 3681 | 21:05:15 |
| #2 | Search (cancer OR neoplasm OR carcinoma OR tumor OR phyma) | 4062748 | 21:05:07 |
| #1 | Search (colon OR colorectal OR rectum OR bowel) | 680337 | 21:04:47 |
